# Supplementary material
Source: publisher figshare collection journal article supplement (https://gsapubs.figshare.com/ndownloader/files/23308751)
Supplement: Supplementary file 1 [file 23308751]

Long, S.P., 2018, Geometry and magnitude of extension in the Basin and Range Province (39°N), Utah, Nevada, and California, USA: Constraints from a province-scale cross section: GSA Bulletin, <https://doi.org/10.1130/B31974.1>.

## Data Repository

**Plate DR1.** Geologic cross section across the Basin and Range Province at ~39°N (1:200,000-scale). The present-day geometry is shown on A, and the pre-extensional geometry is shown on B. See the text for details on restoration methodology and estimation of extension. Light shaded areas above the modern surface on A represent eroded rock. The present-day and restored positions of the Paleogene unconformity, which is the datum used to restore extension, are shown with thick red lines. On B, the Paleogene unconformity is restored to an elevation of ~3 km, and light shaded areas above the unconformity either represent eroded pre-Paleogene rocks or Paleogene and younger rocks deposited above the unconformity. On B, the restored positions of the modern erosion surface are shown with thick blue lines. Crustal thickness data from proximal EarthScope USArray seismic stations distributed along the length of the cross section (Gilbert, 2012) are shown on A. Interpretations of Moho depth and prominent reflectors from the COCORP seismic reflection profile are also shown on A, and are modified from Allmendinger et al. (1983) for western Utah, Hauser et al. (1987) for eastern Nevada, Allmendinger et al. (1987) for central Nevada, and Surpless et al. (2002) for western Nevada and eastern California. The COCORP data illustrate important aspects of crustal structure, but were not used for the calculation of pre-extensional thicknesses, as they were collected from ~100 km to the north of the section line across much of Nevada (see Fig. 1A in the main text).

**Figure DR1.** Geologic map of part of the northern Pancake Range (1:12,000-scale), mapped by S. Long. Location of cross section line is shown with dark gray line.

**Table DR1.** Data supporting three-point problems for determination of fault and unconformity dip angles. The ‘strike azimuth’ was determined by locating two points of equal elevation along a fault trace, and connecting them with a line. The ‘elevation difference’ column represents the vertical distance between the elevation that the strike azimuth was determined at and a lower-elevation point measured along the fault trace, which was typically located at the bottom of a drainage. The ‘horizontal distance’ column represents the map distance between the strike azimuth line and the lower-elevation point, measured perpendicular from the strike azimuth line. The ‘fault dip angle’ was calculated by the equation:  $\text{dip angle} = \tan^{-1}(\text{elevation difference/horizontal distance})$ .

## REFERENCES CITED

- Allmendinger, R.W., Sharp, J.W., Von Tish, D., Serpa, L., Brown, L., Kaufman, S., and Oliver, J., 1983, Cenozoic and Mesozoic structure of the eastern Basin and Range Province, Utah, from COCORP seismic-reflection data: *Geology*, v. 11, p. 532–536, [https://doi.org/10.1130/0091-7613\(1983\)11<532:CAMSOT>2.0.CO;2](https://doi.org/10.1130/0091-7613(1983)11<532:CAMSOT>2.0.CO;2).
- Allmendinger, R.W., Hauge, T., Hauser, E.C., Potter, C.J., Klemperer, S.L., Nelson, D.K., Knuepfer, P., and Oliver, J., 1987, Overview of the COCORP 40°N transect, western United States; the fabric of an orogenic belt: *Geological Society of America Bulletin*, v. 98, p. 308–319, [https://doi.org/10.1130/0016-7606\(1987\)98<308:OOTCNT>2.0.CO;2](https://doi.org/10.1130/0016-7606(1987)98<308:OOTCNT>2.0.CO;2).
- Brokaw, A.L., 1967, Geologic map and sections of the Ely quadrangle, White Pine County, Nevada: U.S. Geological Survey Geologic Quadrangle Map GQ-697, scale 1:24,000, 1 sheet.
- Brokaw, A.L., and Heidrick, T., 1966, Geologic map and sections of the Giroux Wash quadrangle, White Pine County, Nevada: U.S. Geological Survey Geologic Quadrangle Map I-449, scale 1:24,000, 1 sheet.
- Drewes, H., 1967, Geology of the Connors Pas quadrangle, Schell Creek Range, east-central Nevada: U.S. Geological Survey Professional Paper 557, scale 1:48,000, 1 sheet, 93 p.
- Ferguson, H.G., and Cathcart, S.H., 1954, Geologic map of the Round Mountain quadrangle, Nevada: U.S. Geological Survey Geologic Quadrangle Map 40, scale 1:125,000, 1 sheet.
- Gilbert, H., 2012, Crustal structure and signatures of recent tectonism as influenced by ancient terranes in the western United States: *Geosphere*, v. 8, p. 141–157, <https://doi.org/10.1130/GES00720.1>.
- Hauser, E., Potter, C., Hauge, T., Burgess, S., Burtch, S., Mutschler, J., Allmendinger, R., Brown, L., Kaufman, S., and Oliver, J., 1987, Crustal structure of eastern Nevada from COCORP deep seismic reflection data: *Geological Society of America Bulletin*, v. 99, p. 833–844, doi:[https://doi.org/10.1130/0016-7606\(1987\)99<833:CSOENF>2.0.CO;2](https://doi.org/10.1130/0016-7606(1987)99<833:CSOENF>2.0.CO;2).
- Lohr, L.S., 1965, Geology of the Brock Canyon area, Monitor Range, Eureka County, Nevada [M.S. thesis]: Reno, University of Nevada, Reno, 44 p., 2 plates.
- McKee, E.H., and Conrad, J.E., 1998, Geologic Map of the Frazier Creek Quadrangle, Nevada: Nevada Bureau of Mines and Geology Field Studies Map 15, scale 1:24,000, 1 sheet.
- Schalla, R.A., 1978, Paleozoic stratigraphy of the southern Mahogany Hills, Eureka County, Nevada [M.S. thesis]: Corvallis, Oregon State University, 118 p., 6 plates.
- Silberling, N.J., and John, D.A., 1989, Geologic map of pre-Tertiary rocks of the Paradise Range and southern Lodi Hills, west-central Nevada: U.S. Geological Survey Miscellaneous Field Studies Map MF-2062, scale 1:24,000, 1 sheet.
- Surpless, B.E., Stockli, D.F., Dumitru, T.A., and Miller, E.L., 2002, Two-phase westward encroachment of Basin and Range extension into the northern Sierra Nevada: *Tectonics*, v. 21, no. 1, <https://doi.org/10.1029/2000TC001257>.



# Geologic map of part of the northern Pancake Range

Scale: 1:12,000

1 kilometer

1 mile

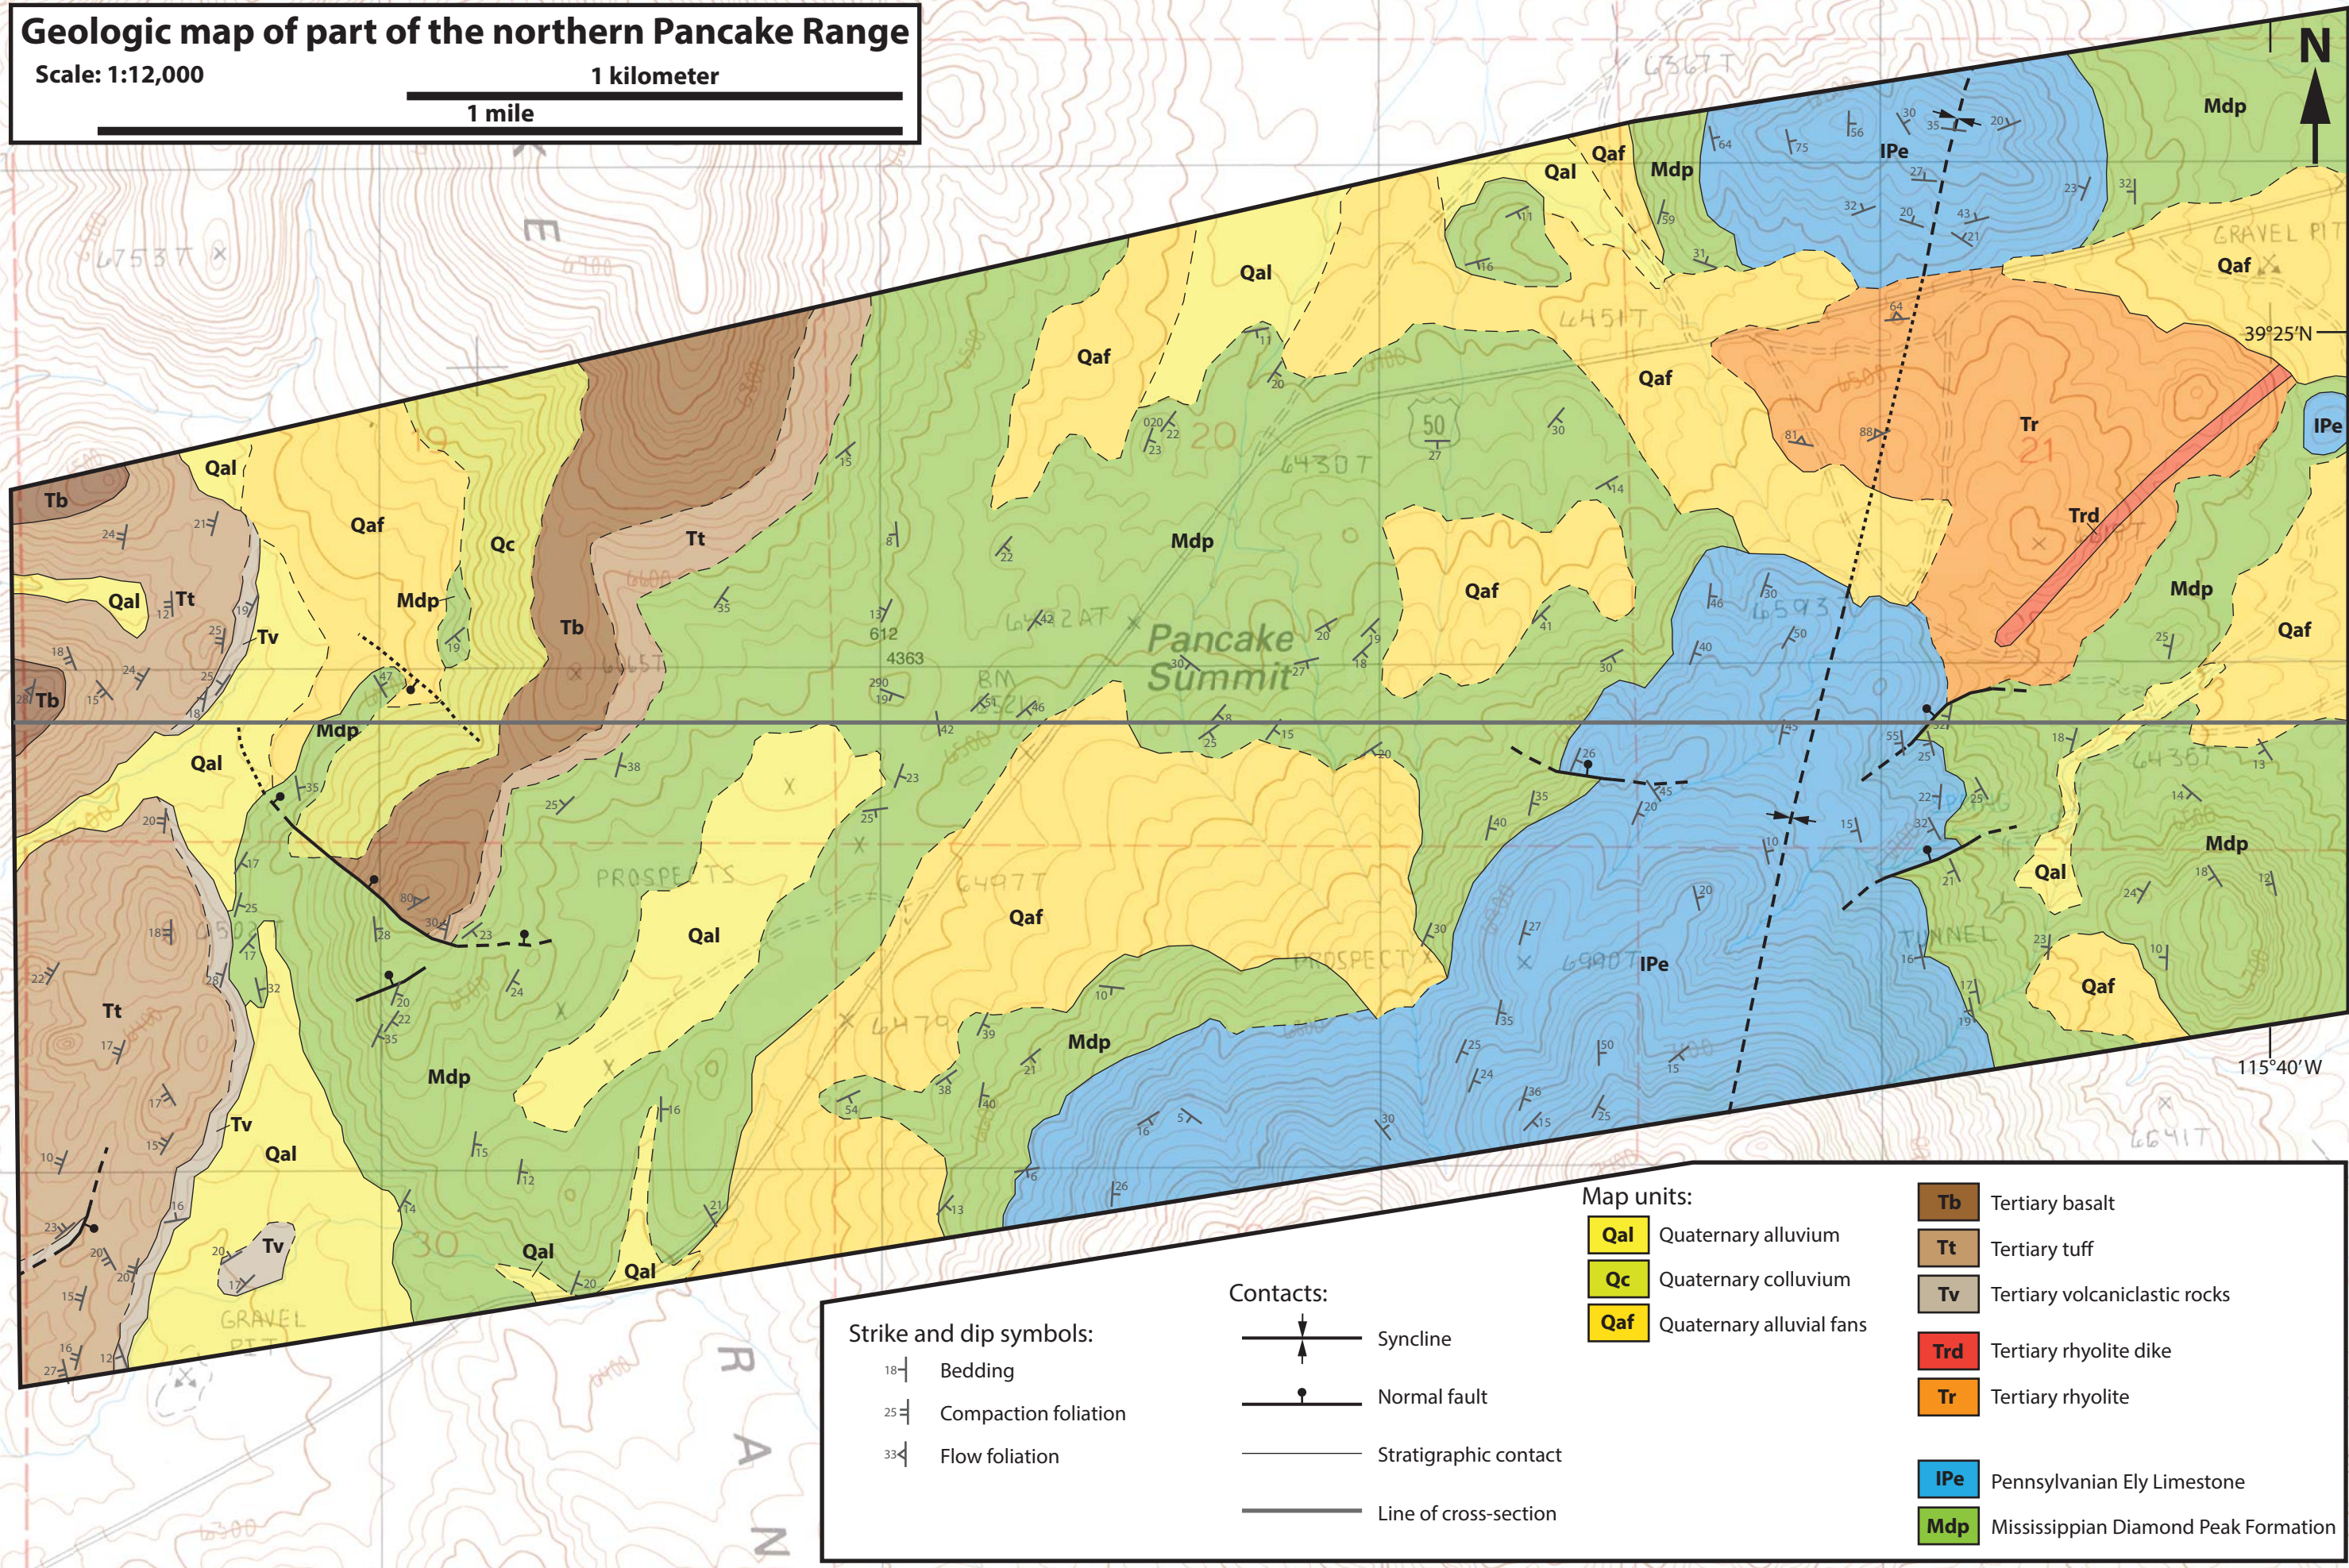

## Strike and dip symbols:

- 18| Bedding
- 25| Compaction foliation
- 33| Flow foliation

## Contacts:

- Syncline
- Normal fault
- Stratigraphic contact
- Line of cross-section

## Map units:

- Qal Quaternary alluvium
- Qc Quaternary colluvium
- Qaf Quaternary alluvial fans

- Tb Tertiary basalt
- Tt Tertiary tuff
- Tv Tertiary volcaniclastic rocks
- Trd Tertiary rhyolite dike
- Tr Tertiary rhyolite
- IPe Pennsylvanian Ely Limestone
- Mdp Mississippian Diamond Peak Formation

| Location and fault                                         | Geologic mapping source      | Strike azimuth | Elevation difference | Horizontal distance | Fault dip angle |
|------------------------------------------------------------|------------------------------|----------------|----------------------|---------------------|-----------------|
| Schell Creek Range, easternmost low-angle normal fault     | Drewes (1967)                | 008°           | 160'                 | 600'                | 15° W           |
| Schell Creek Range, low-angle normal fault (2nd from east) | Drewes (1967)                | 353°           | 200'                 | 800'                | 14° W           |
| Egan Range, 2nd-order W-dipping normal fault               | Brokaw (1967)                | 330°           | 200'                 | 200'                | 45° W           |
| Egan Range, Kaibab fault                                   | Brokaw and Heidrick (1966)   | 341°           | 80'                  | 500'                | 9° W            |
| Mahogany Hills, 1st-order W-dipping normal fault           | Schalla (1978)               | 338°           | 180'                 | 550'                | 18° W           |
| Monitor Range, E-dipping thrust fault                      | Lohr (1965)                  | 353°           | 480'                 | 2800'               | 10° E           |
| Toiyabe range, Paleogene unconformity (1)                  | Ferguson and Cathcart (1954) | 010°           | 2000'                | 12400'              | 9° W            |
| Toiyabe range, Paleogene unconformity (2)                  | Ferguson and Cathcart (1954) | 023°           | 2400'                | 10400'              | 13° W           |
| Toiyabe range, Paleogene unconformity (3)                  | Ferguson and Cathcart (1954) | 008°           | 1200'                | 4800'               | 14° W           |
| Toiyabe range, Paleogene unconformity (4)                  | Ferguson and Cathcart (1954) | 023°           | 1200'                | 4100'               | 16° W           |
| Toiyabe range, Paleogene unconformity (5)                  | Ferguson and Cathcart (1954) | 027°           | 1500'                | 3400'               | 24° W           |
| Paradise Range, Gabbs thrust                               | Silberling and John (1989)   | 002°           | 1100'                | 5800'               | 12° W           |
| Paradise Range, Paradise fault                             | Silberling and John (1989)   | 354°           | 700'                 | 3200'               | 12° W           |
